# Supplementary material for: The Degree of Acceptance of Cocoon Strategy of Vaccination against Influenza and COVID-19 in Palliative Home Care Professionals and Caregivers
Source: MDPI journal article supplement (doi:10.3390/vaccines11071235), 2023-07-12
Supplement: s1 [file s1]

**Table S1.** Questionnaire structure

|    |                                                                                                                                                                                                                     |
|----|---------------------------------------------------------------------------------------------------------------------------------------------------------------------------------------------------------------------|
| 1  | Your role towards the patient [physician; nurse; physiotherapist; psychologist; medical caregiver]                                                                                                                  |
| 2  | Your date of birth [year; month]                                                                                                                                                                                    |
| 3  | Your gender [female; male; other]                                                                                                                                                                                   |
| 4  | Your main workplace location: rural area; town up to 50,000 inhabitants; city 50,000-100,000 inhabitants; city 100,000-500,000 inhabitants; city >500,000 inhabitants [ordinal scale]                               |
| 5  | Your marital status: [single; couple]                                                                                                                                                                               |
| 6  | Your education: primary, basic vocational, high school, ba, helor's degree, university degree [ordinal scale]                                                                                                       |
| 7  | Your employment status [studying and working; employed only; working on retirement; pension]                                                                                                                        |
| 8  | What is your main source of information on vaccinations? More than one answer may be given. [medical professional; media; Internet; social portals; acquaintance; family; medical journals; other]; multiple choice |
| 8a | I am not interested in vaccinations [yes; no]                                                                                                                                                                       |
| 9  | How do you assess the health status of your charge? Question for actual caregivers ONLY. [very good; good; average; angry; very angry]                                                                              |
| 10 | Did you have any allergic reactions previously (food, contact, insect venom, inhalants, drugs) [yes; no]                                                                                                            |
| 11 | Have you suffered COVID-19? [yes; no; do not know]                                                                                                                                                                  |
| 12 | In your immediate vicinity, are there persons who suffered from or are suffering from COVID-19? [yes; no; do not know]                                                                                              |
| 13 | In your immediate vicinity, were there persons who died from COVID-19? [yes; no; do not know]                                                                                                                       |
| 14 | Do you follow the recommendations regarding the pandemic:                                                                                                                                                           |
| a  | Do you wear a mask when approaching the patient? [yes; no]                                                                                                                                                          |
| b  | Do you wear a helmet when approaching the patient? [yes; no]                                                                                                                                                        |
| c  | Do you follow the pandemic recommendation to disinfect hands? [yes; no]                                                                                                                                             |
| d  | Do you follow the pandemic recommendation to maintain a social distance? [yes; no]                                                                                                                                  |
| 15 | Please rate your attitude to the answers to the following statements:                                                                                                                                               |
| a  | Vaccinations are the most effective way to protect against infectious diseases. [Likert scale]                                                                                                                      |
| b  | Vaccinations are promoted not because they are really needed but because it is in pharmaceutical companies' interests. [Likert scale]                                                                               |
| c  | Vaccinations are unnecessary because infectious diseases are rare. [Likert scale]                                                                                                                                   |
| d  | Vaccinations provide more benefits than risks. [Likert scale]                                                                                                                                                       |
| e  | I do not need to vaccinate because the risk of getting sick and infecting my charge is small, as I respect the rules of isolation and have no contact with other people. [Likert scale]                             |
| 16 | Do you agree with the following claims about influenza vaccination?                                                                                                                                                 |

- a Influenza vaccination is safe. [Likert scale]
  - b Influenza vaccination is effective. [Likert scale]
  - c Influenza vaccination is necessary to avoid illness, complications, and hospitalization. [Likert scale]
  - d I will get vaccinated against influenza in order to ensure the epidemiological safety of my patients; charge. [Likert scale]
  - e I will get vaccinated against influenza in order to ensure my own epidemiological safety. [Likert scale]
  - f Chronic diseases (e.g., cancer, lung and circulatory diseases, diabetes, obesity) cause a severe course of influenza.
  - g Influenza is dangerous for my charge; patients. [Likert scale]
  - h My knowledge of influenza vaccination is sufficient. [Likert scale]
- 

17 Do you agree with the following claims of vaccination against COVID-19?

- a COVID-19 vaccination is safe. [Likert scale]
  - b COVID-19 vaccination is effective. [Likert scale]
  - c COVID-19 vaccination is necessary to avoid illness, complications, and hospitalization. [Likert scale]
  - d I will get vaccinated against COVID-19 in order to ensure the epidemiological safety of my patients; charge. [Likert scale]
  - e I will get vaccinated against COVID-19 in order to ensure my own epidemiological safety. [Likert scale]
  - f Chronic diseases (e.g., cancer, lung and circulatory diseases, diabetes, obesity) cause a severe course of COVID-19. [Likert scale]
  - g COVID-19 is dangerous for my charge; patients. [Likert scale]
  - h My knowledge of COVID-19 vaccination is sufficient. [Likert scale]
- 

18 Do you get vaccinated against influenza? [I have never got vaccinated; Only this season; I got vaccinated but not regularly; Regularly every year]

---

19 Have you already been vaccinated against COVID-19? [Yes, I have already been vaccinated; No, but I am scheduled for a vaccination; I will not get vaccinated now because I have a high antibody titer after passing COVID-19; I will not get vaccinated because I have contraindications; I will not get vaccinated because I am not sure that the vaccine is safe; I will not get vaccinated because I don't think it's necessary]

---

**Table S2.** Opinion on influenza vaccination.

|                                                                                                                              | N   | Strongly disagree | Disagree | Neutral | Agree | Strongly agree | Missing |
|------------------------------------------------------------------------------------------------------------------------------|-----|-------------------|----------|---------|-------|----------------|---------|
| <b>Influenza vaccination is safe.</b>                                                                                        |     |                   |          |         |       |                |         |
| physician                                                                                                                    | 123 | 1%                | 2%       | 3%      | 28%   | 67%            | 0%      |
| nurse                                                                                                                        | 217 | 0%                | 5%       | 13%     | 46%   | 35%            | 1%      |
| physiotherapist                                                                                                              | 29  | 0%                | 3%       | 13%     | 45%   | 32%            | 6%      |
| caregiver                                                                                                                    | 41  | 0%                | 5%       | 17%     | 33%   | 45%            | 0%      |
| psychologist                                                                                                                 | 24  | 0%                | 4%       | 13%     | 46%   | 38%            | 0%      |
| <b>Influenza vaccination is effective.</b>                                                                                   |     |                   |          |         |       |                |         |
| physician                                                                                                                    | 123 | 1%                | 1%       | 7%      | 50%   | 41%            | 1%      |
| nurse                                                                                                                        | 217 | 0%                | 7%       | 23%     | 43%   | 25%            | 1%      |
| physiotherapist                                                                                                              | 29  | 0%                | 10%      | 13%     | 58%   | 16%            | 3%      |
| caregiver                                                                                                                    | 41  | 0%                | 7%       | 17%     | 43%   | 33%            | 0%      |
| psychologist                                                                                                                 | 24  | 0%                | 0%       | 33%     | 38%   | 29%            | 0%      |
| <b>Influenza vaccination is necessary to avoid illness, complications, and hospitalization.</b>                              |     |                   |          |         |       |                |         |
| physician                                                                                                                    | 123 | 1%                | 2%       | 2%      | 35%   | 60%            | 0%      |
| nurse                                                                                                                        | 217 | 1%                | 9%       | 19%     | 40%   | 29%            | 2%      |
| physiotherapist                                                                                                              | 29  | 0%                | 13%      | 19%     | 39%   | 26%            | 3%      |
| caregiver                                                                                                                    | 41  | 0%                | 5%       | 19%     | 48%   | 29%            | 0%      |
| psychologist                                                                                                                 | 24  | 0%                | 4%       | 33%     | 25%   | 38%            | 0%      |
| <b>I will get vaccinated against influenza in order to ensure the epidemiological safety of my patients/charge.</b>          |     |                   |          |         |       |                |         |
| physician                                                                                                                    | 123 | 6%                | 9%       | 3%      | 19%   | 62%            | 2%      |
| nurse                                                                                                                        | 217 | 11%               | 23%      | 12%     | 25%   | 25%            | 3%      |
| physiotherapist                                                                                                              | 29  | 16%               | 13%      | 23%     | 16%   | 29%            | 3%      |
| caregiver                                                                                                                    | 41  | 2%                | 12%      | 21%     | 21%   | 43%            | 0%      |
| psychologist                                                                                                                 | 24  | 0%                | 33%      | 17%     | 4%    | 42%            | 4%      |
| <b>I will get vaccinated against influenza in order to ensure my own epidemiological safety.</b>                             |     |                   |          |         |       |                |         |
| physician                                                                                                                    | 123 | 4%                | 10%      | 3%      | 15%   | 67%            | 1%      |
| nurse                                                                                                                        | 217 | 11%               | 22%      | 16%     | 15%   | 33%            | 3%      |
| physiotherapist                                                                                                              | 29  | 29%               | 13%      | 13%     | 13%   | 29%            | 3%      |
| caregiver                                                                                                                    | 41  | 2%                | 17%      | 21%     | 17%   | 43%            | 0%      |
| psychologist                                                                                                                 | 24  | 0%                | 33%      | 17%     | 4%    | 42%            | 4%      |
| <b>Chronic diseases (e.g., cancer, lung and circulatory diseases, diabetes, obesity) cause a severe course of influenza.</b> |     |                   |          |         |       |                |         |
| physician                                                                                                                    | 123 | 3%                | 2%       | 2%      | 29%   | 63%            | 1%      |
| nurse                                                                                                                        | 217 | 6%                | 11%      | 10%     | 38%   | 32%            | 3%      |
| physiotherapist                                                                                                              | 29  | 3%                | 10%      | 19%     | 42%   | 23%            | 3%      |
| caregiver                                                                                                                    | 41  | 2%                | 14%      | 33%     | 17%   | 33%            | 0%      |
| psychologist                                                                                                                 | 24  | 4%                | 8%       | 21%     | 33%   | 29%            | 4%      |
| <b>Influenza is dangerous for my charge/patients.</b>                                                                        |     |                   |          |         |       |                |         |
| physician                                                                                                                    | 123 | 2%                | 2%       | 3%      | 27%   | 61%            | 5%      |

|                                                             |     |    |     |     |     |     |    |
|-------------------------------------------------------------|-----|----|-----|-----|-----|-----|----|
| nurse                                                       | 217 | 1% | 4%  | 8%  | 47% | 37% | 3% |
| physiotherapist                                             | 29  | 3% | 6%  | 13% | 32% | 39% | 6% |
| caregiver                                                   | 41  | 0% | 5%  | 21% | 33% | 38% | 2% |
| psychologist                                                | 24  | 0% | 4%  | 13% | 38% | 38% | 8% |
| <b>My knowledge of influenza vaccination is sufficient.</b> |     |    |     |     |     |     |    |
| physician                                                   | 123 | 1% | 6%  | 4%  | 41% | 47% | 2% |
| nurse                                                       | 217 | 0% | 7%  | 11% | 56% | 24% | 2% |
| physiotherapist                                             | 29  | 0% | 6%  | 10% | 55% | 23% | 6% |
| caregiver                                                   | 41  | 0% | 12% | 19% | 45% | 21% | 2% |
| psychologist                                                | 24  | 0% | 8%  | 42% | 17% | 29% | 4% |

**Table S3.** Opinion on COVID-19 vaccination.

|                                                                                                                             | N   | Strongly disagree | Disagree | Neutral | Agree | Strongly agree | Missing |
|-----------------------------------------------------------------------------------------------------------------------------|-----|-------------------|----------|---------|-------|----------------|---------|
| <b>COVID-19 vaccination is safe.</b>                                                                                        |     |                   |          |         |       |                |         |
| physician                                                                                                                   | 123 | 1%                | 0%       | 7%      | 50%   | 43%            | 0%      |
| nurse                                                                                                                       | 217 | 1%                | 3%       | 33%     | 46%   | 15%            | 2%      |
| physiotherapist                                                                                                             | 29  | 3%                | 0%       | 16%     | 52%   | 29%            | 0%      |
| caregiver                                                                                                                   | 41  | 2%                | 0%       | 29%     | 38%   | 26%            | 5%      |
| psychologist                                                                                                                | 24  | 0%                | 4%       | 33%     | 33%   | 25%            | 4%      |
| <b>COVID-19 vaccination is effective.</b>                                                                                   |     |                   |          |         |       |                |         |
| physician                                                                                                                   | 123 | 1%                | 0%       | 15%     | 46%   | 38%            | 1%      |
| nurse                                                                                                                       | 217 | 0%                | 3%       | 44%     | 39%   | 12%            | 2%      |
| physiotherapist                                                                                                             | 29  | 3%                | 0%       | 19%     | 58%   | 19%            | 0%      |
| caregiver                                                                                                                   | 41  | 2%                | 2%       | 31%     | 31%   | 29%            | 5%      |
| psychologist                                                                                                                | 24  | 0%                | 0%       | 38%     | 46%   | 17%            | 0%      |
| <b>COVID-19 vaccination is necessary to avoid illness, complications, and hospitalization.</b>                              |     |                   |          |         |       |                |         |
| physician                                                                                                                   | 123 | 1%                | 0%       | 3%      | 22%   | 74%            | 0%      |
| nurse                                                                                                                       | 217 | 1%                | 4%       | 18%     | 44%   | 32%            | 1%      |
| physiotherapist                                                                                                             | 29  | 3%                | 0%       | 10%     | 52%   | 35%            | 0%      |
| caregiver                                                                                                                   | 41  | 2%                | 2%       | 14%     | 33%   | 48%            | 0%      |
| psychologist                                                                                                                | 24  | 0%                | 0%       | 13%     | 50%   | 33%            | 4%      |
| <b>I will get vaccinated against COVID-19 in order to ensure the epidemiological safety of my patients/charge.</b>          |     |                   |          |         |       |                |         |
| physician                                                                                                                   | 123 | 2%                | 2%       | 3%      | 7%    | 85%            | 2%      |
| nurse                                                                                                                       | 217 | 5%                | 6%       | 9%      | 28%   | 50%            | 2%      |
| physiotherapist                                                                                                             | 29  | 6%                | 3%       | 3%      | 23%   | 58%            | 6%      |
| caregiver                                                                                                                   | 41  | 5%                | 5%       | 14%     | 14%   | 62%            | 0%      |
| psychologist                                                                                                                | 24  | 0%                | 8%       | 8%      | 17%   | 63%            | 4%      |
| <b>I will get vaccinated against COVID-19 in order to ensure my own epidemiological safety.</b>                             |     |                   |          |         |       |                |         |
| physician                                                                                                                   | 123 | 2%                | 2%       | 2%      | 6%    | 89%            | 0%      |
| nurse                                                                                                                       | 217 | 3%                | 6%       | 10%     | 26%   | 53%            | 2%      |
| physiotherapist                                                                                                             | 29  | 6%                | 3%       | 3%      | 29%   | 58%            | 0%      |
| caregiver                                                                                                                   | 41  | 5%                | 7%       | 12%     | 19%   | 57%            | 0%      |
| psychologist                                                                                                                | 24  | 4%                | 4%       | 8%      | 17%   | 63%            | 4%      |
| <b>Chronic diseases (e.g., cancer, lung and circulatory diseases, diabetes, obesity) cause a severe course of COVID-19.</b> |     |                   |          |         |       |                |         |
| physician                                                                                                                   | 123 | 2%                | 0%       | 2%      | 20%   | 75%            | 1%      |
| nurse                                                                                                                       | 217 | 4%                | 6%       | 10%     | 28%   | 50%            | 2%      |
| physiotherapist                                                                                                             | 29  | 6%                | 10%      | 10%     | 26%   | 48%            | 0%      |
| caregiver                                                                                                                   | 41  | 7%                | 7%       | 19%     | 33%   | 31%            | 2%      |
| psychologist                                                                                                                | 24  | 4%                | 0%       | 8%      | 33%   | 50%            | 4%      |
| <b>COVID-19 is dangerous for my charge/patients.</b>                                                                        |     |                   |          |         |       |                |         |
| physician                                                                                                                   | 123 | 1%                | 0%       | 2%      | 15%   | 80%            | 2%      |
| nurse                                                                                                                       | 217 | 0%                | 2%       | 10%     | 30%   | 54%            | 3%      |
| physiotherapist                                                                                                             | 29  | 0%                | 0%       | 6%      | 32%   | 58%            | 3%      |
| caregiver                                                                                                                   | 41  | 2%                | 0%       | 17%     | 24%   | 57%            | 0%      |
| psychologist                                                                                                                | 24  | 4%                | 4%       | 8%      | 29%   | 50%            | 4%      |

---

**My knowledge of COVID-19 vaccination is sufficient.**

|                 |     |    |     |     |     |     |    |
|-----------------|-----|----|-----|-----|-----|-----|----|
| physician       | 123 | 1% | 5%  | 11% | 43% | 40% | 1% |
| nurse           | 217 | 3% | 14% | 16% | 44% | 21% | 2% |
| physiotherapist | 29  | 0% | 0%  | 23% | 58% | 16% | 3% |
| caregiver       | 41  | 5% | 12% | 21% | 33% | 26% | 2% |
| psychologist    | 24  | 0% | 0%  | 29% | 42% | 25% | 4% |

---

**Table S4.** Spearman rank correlation coefficients for general opinion on vaccinations and opinion on influenza and COVID-19. All values are statistically significant ( $p < 0.0017$ —with the Bonferroni correction for multiple comparisons), except for marked with parentheses ( $p < 0.05$ ).

|                                                                                                                                                                                            | (1)   | (2)   | (3)     | (4)     | (5)   | (6)     |
|--------------------------------------------------------------------------------------------------------------------------------------------------------------------------------------------|-------|-------|---------|---------|-------|---------|
| (1) Thanks to vaccinations, many dangerous infectious diseases do not occur today.                                                                                                         | 1.00  | 0.62  | -0.33   | -0.35   | 0.48  | -0.35   |
| (2) Vaccinations are the most effective way to protect against infectious diseases.                                                                                                        | 0.62  | 1.00  | -0.31   | -0.33   | 0.57  | -0.34   |
| (3) Vaccinations are promoted not because they are really needed, but because it is in the interests of pharmaceutical companies.                                                          | -0.33 | -0.31 | 1.00    | 0.57    | -0.40 | 0.55    |
| (4) Vaccinations are unnecessary because infectious diseases are rare.                                                                                                                     | -0.35 | -0.33 | 0.57    | 1.00    | -0.34 | 0.66    |
| (5) Vaccinations provide more benefits than risks.                                                                                                                                         | 0.48  | 0.57  | -0.40   | -0.34   | 1.00  | -0.38   |
| (6) I do not need to vaccinate, because in my case the risk of getting sick and infecting my charge is small, as I respect the rules of isolation and I have no contact with other people. | -0.35 | -0.34 | 0.55    | 0.66    | -0.38 | 1.00    |
| (7) Influenza vaccination is safe.                                                                                                                                                         | 0.41  | 0.47  | -0.33   | -0.25   | 0.45  | -0.28   |
| (8) Influenza vaccination is effective.                                                                                                                                                    | 0.35  | 0.42  | -0.26   | -0.21   | 0.45  | -0.24   |
| (9) Influenza vaccination is necessary to avoid illness, complications, and hospitalization.                                                                                               | 0.36  | 0.46  | -0.27   | -0.23   | 0.43  | -0.30   |
| (10) I will get vaccinated against influenza in order to ensure the epidemiological safety of my patients/charge.                                                                          | 0.30  | 0.40  | -0.22   | -0.19   | 0.35  | -0.26   |
| (11) I will get vaccinated against influenza in order to ensure my own epidemiological safety.                                                                                             | 0.33  | 0.42  | -0.26   | -0.22   | 0.39  | -0.27   |
| (12) Chronic diseases (e.g., cancer, lung and circulatory diseases, diabetes, obesity) cause a severe course of influenza.                                                                 | 0.32  | 0.34  | -0.16   | -0.19   | 0.35  | -0.22   |
| (13) Influenza is dangerous for my charge/patients.                                                                                                                                        | 0.33  | 0.36  | (-0.15) | -0.17   | 0.32  | -0.26   |
| (14) My knowledge of influenza vaccination is sufficient.                                                                                                                                  | 0.22  | 0.29  | (-0.12) | (-0.12) | 0.30  | (-0.14) |
| (15) COVID-19 vaccination is safe.                                                                                                                                                         | 0.35  | 0.46  | -0.34   | -0.21   | 0.47  | -0.31   |
| (16) COVID-19 vaccination is effective.                                                                                                                                                    | 0.31  | 0.43  | -0.33   | -0.21   | 0.47  | -0.28   |
| (17) COVID-19 vaccination is necessary to avoid illness, complications, and hospitalization.                                                                                               | 0.37  | 0.51  | -0.37   | -0.26   | 0.54  | -0.38   |
| (18) I will get vaccinated against COVID-19 in order to ensure the epidemiological safety of my patients/charge.                                                                           | 0.39  | 0.46  | -0.36   | -0.34   | 0.51  | -0.52   |
| (19) I will get vaccinated against COVID-19 in order to ensure my own epidemiological safety.                                                                                              | 0.44  | 0.53  | -0.41   | -0.38   | 0.52  | -0.56   |
| (20) Chronic diseases (e.g., cancer, lung and circulatory diseases, diabetes, obesity) cause a severe course of COVID-19.                                                                  | 0.40  | 0.42  | -0.30   | -0.27   | 0.43  | -0.34   |
| (21) COVID-19 is dangerous for my charge/patients.                                                                                                                                         | 0.39  | 0.50  | -0.30   | -0.32   | 0.45  | -0.42   |
| (22) My knowledge of COVID-19 vaccination is sufficient.                                                                                                                                   | 0.16  | 0.30  | -0.19   | (-0.09) | 0.26  | -0.16   |

**Table S5.** Spearman rank correlation coefficients for opinion on influenza and COVID-19. All values are statistically significant ( $p < 0.0017$ —with the Bonferroni correction for multiple comparisons).

|                                                                                                                           | (1)  | (2)  | (3)  | (4)  | (5)  | (6)  | (7)  | (8)  | (9)  | (10) | (11) | (12) | (13) | (14) | (15) | (16) |
|---------------------------------------------------------------------------------------------------------------------------|------|------|------|------|------|------|------|------|------|------|------|------|------|------|------|------|
| (1) Influenza vaccination is safe.                                                                                        | 1    | 0.71 | 0.7  | 0.64 | 0.63 | 0.39 | 0.47 | 0.45 | 0.58 | 0.52 | 0.53 | 0.49 | 0.53 | 0.38 | 0.41 | 0.35 |
| (2) Influenza vaccination is effective.                                                                                   | 0.71 | 1    | 0.78 | 0.67 | 0.63 | 0.42 | 0.48 | 0.54 | 0.6  | 0.56 | 0.57 | 0.5  | 0.5  | 0.36 | 0.43 | 0.4  |
| (3) Influenza vaccination is necessary to avoid illness, complications, and hospitalization.                              | 0.7  | 0.78 | 1    | 0.72 | 0.69 | 0.49 | 0.53 | 0.49 | 0.56 | 0.54 | 0.6  | 0.53 | 0.55 | 0.44 | 0.48 | 0.39 |
| (4) I will get vaccinated against influenza in order to ensure the epidemiological safety of my patients/charge.          | 0.64 | 0.67 | 0.72 | 1    | 0.87 | 0.41 | 0.5  | 0.48 | 0.52 | 0.5  | 0.53 | 0.56 | 0.54 | 0.36 | 0.39 | 0.36 |
| (5) I will get vaccinated against influenza in order to ensure my own epidemiological safety.                             | 0.63 | 0.63 | 0.69 | 0.87 | 1    | 0.41 | 0.49 | 0.45 | 0.53 | 0.51 | 0.54 | 0.53 | 0.57 | 0.38 | 0.36 | 0.37 |
| (6) Chronic diseases (e.g., cancer, lung and circulatory diseases, diabetes, obesity) cause a severe course of influenza. | 0.39 | 0.42 | 0.49 | 0.41 | 0.41 | 1    | 0.61 | 0.39 | 0.35 | 0.34 | 0.38 | 0.35 | 0.34 | 0.6  | 0.46 | 0.2  |
| (7) Influenza is dangerous for my charge/patients.                                                                        | 0.47 | 0.48 | 0.53 | 0.5  | 0.49 | 0.61 | 1    | 0.44 | 0.4  | 0.37 | 0.44 | 0.4  | 0.39 | 0.45 | 0.53 | 0.25 |
| (8) My knowledge of influenza vaccination is sufficient.                                                                  | 0.45 | 0.54 | 0.49 | 0.48 | 0.45 | 0.39 | 0.44 | 1    | 0.4  | 0.41 | 0.39 | 0.31 | 0.31 | 0.28 | 0.33 | 0.61 |
| (9) COVID-19 vaccination is safe.                                                                                         | 0.58 | 0.6  | 0.56 | 0.52 | 0.53 | 0.35 | 0.4  | 0.4  | 1    | 0.8  | 0.73 | 0.64 | 0.63 | 0.42 | 0.49 | 0.53 |
| (10) COVID-19 vaccination is effective.                                                                                   | 0.52 | 0.56 | 0.54 | 0.5  | 0.51 | 0.34 | 0.37 | 0.41 | 0.8  | 1    | 0.73 | 0.59 | 0.57 | 0.44 | 0.48 | 0.57 |
| (11) COVID-19 vaccination is necessary to avoid illness, complications, and hospitalization.                              | 0.53 | 0.57 | 0.6  | 0.53 | 0.54 | 0.38 | 0.44 | 0.39 | 0.73 | 0.73 | 1    | 0.69 | 0.68 | 0.47 | 0.55 | 0.5  |
| (12) I will get vaccinated against COVID-19 in order to ensure the epidemiological safety of my patients/charge.          | 0.49 | 0.5  | 0.53 | 0.56 | 0.53 | 0.35 | 0.4  | 0.31 | 0.64 | 0.59 | 0.69 | 1    | 0.88 | 0.52 | 0.62 | 0.42 |
| (13) I will get vaccinated against COVID-19 in order to ensure my own epidemiological safety.                             | 0.53 | 0.5  | 0.55 | 0.54 | 0.57 | 0.34 | 0.39 | 0.31 | 0.63 | 0.57 | 0.68 | 0.88 | 1    | 0.51 | 0.62 | 0.39 |



|                                                                                                                           |      |      |      |      |      |      |      |      |      |      |      |      |      |      |      |      |
|---------------------------------------------------------------------------------------------------------------------------|------|------|------|------|------|------|------|------|------|------|------|------|------|------|------|------|
| (14) Chronic diseases (e.g., cancer, lung and circulatory diseases, diabetes, obesity) cause a severe course of COVID-19. | 0.38 | 0.36 | 0.44 | 0.36 | 0.38 | 0.6  | 0.45 | 0.28 | 0.42 | 0.44 | 0.47 | 0.52 | 0.51 | 1    | 0.69 | 0.31 |
| (15) COVID-19 is dangerous for my charge/patients.                                                                        | 0.41 | 0.43 | 0.48 | 0.39 | 0.36 | 0.46 | 0.53 | 0.33 | 0.49 | 0.48 | 0.55 | 0.62 | 0.62 | 0.69 | 1    | 0.33 |
| (16) My knowledge of COVID-19 vaccination is sufficient.                                                                  | 0.35 | 0.4  | 0.39 | 0.36 | 0.37 | 0.2  | 0.25 | 0.61 | 0.53 | 0.57 | 0.5  | 0.42 | 0.39 | 0.31 | 0.33 | 1    |

---

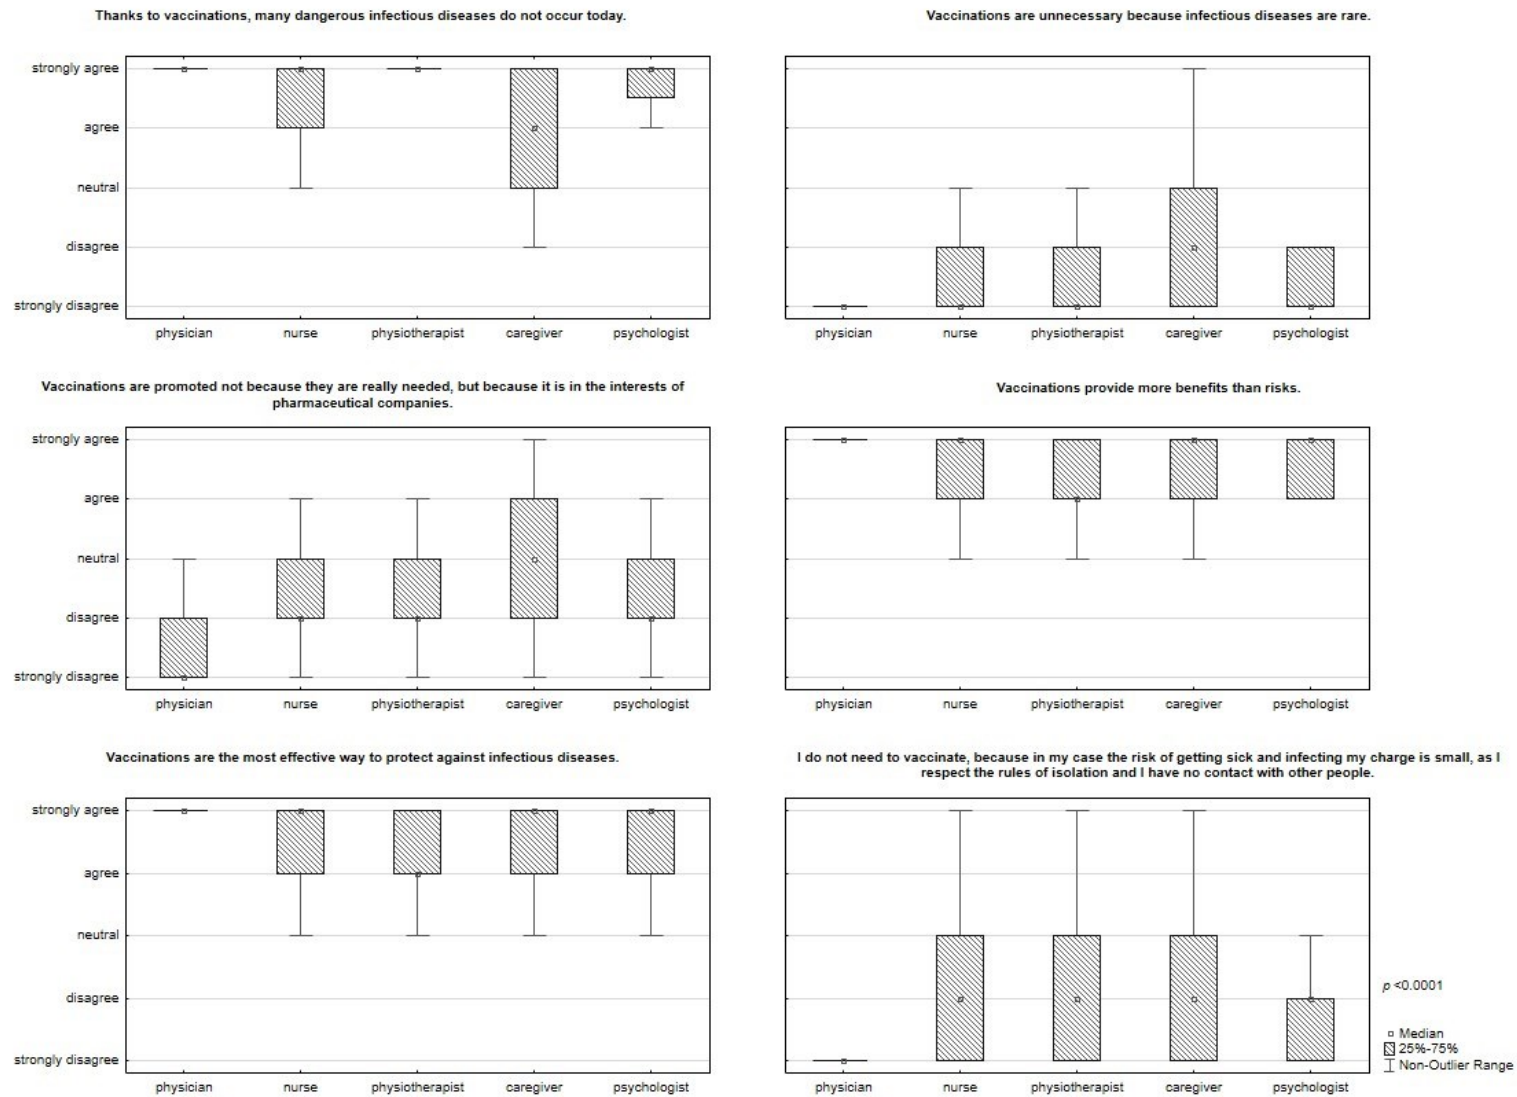

**Figure S1.** The box-whiskers graph of general opinions on vaccinations in role groups. The differences are statistically significant ( $p < 0.0001$ ).
